# Supplementary material for: A Change in Perspective: From Dual Diagnosis to Multimorbidity
Source: Atypon-hosted journal article supplement (doi:10.1176/appi.ps.201700194), 2017-10-16
Supplement: appi.ps.201700194.ds001.pdf [file appi.ps.201700194.ds001.pdf]

Supplementary Table 1: List of psychiatric diagnoses

| Psychiatric Diagnosis          | ICD-9 Code                            |
|--------------------------------|---------------------------------------|
| Dementia                       | 290.00-290.99; 294.10, 331.00         |
| Schizophrenia                  | 295.xx                                |
| Other Psychosis                | 297.xx-299.xx                         |
| Bipolar Disorder               | 296.0x, 296.1x, 296.40-296.89         |
| Major Depressive Disorder      | 296.2-296.39                          |
| Other Depressive Disorders     | 300.4x, 296.9x, 311.xx, 301.10-301.19 |
| Post-Traumatic Stress Disorder | 309.81                                |
| Anxiety Disorders              | 300.xx excluding 300.4                |
| Adjustment Disorder            | 309.xx excluding 309.81               |
| Personality Disorders          | 301.0x or 301.2x-301.99               |

Supplementary Table 2: List of psychotropic medications

| Medication Class                   | Medication                                                                                                                                                                                                                                                                                                                                                       |
|------------------------------------|------------------------------------------------------------------------------------------------------------------------------------------------------------------------------------------------------------------------------------------------------------------------------------------------------------------------------------------------------------------|
| Antidepressants                    | amitriptyline, amoxapine, clomipramine, desipramine, doxepin, imipramine, nortriptyline, protriptyline, trimipramine, isocarboxazid, phenelzine, selegeline, tranylcypromine, bupropion, citalopram, desvenlafaxine, duloxetine, escitalopram, fluoxetine, fluvoxamine, maprotiline, mirtazapine, nefazodone, paroxetine, sertraline, trazodone, and venlafaxine |
| Antipsychotics                     | chlorpromazine, fluphenazine, perphenazine, thioridazine, thiothixene, trifluoperazine, aripiprazole, clozapine, haloperidol, loxapine, molindone, olanzapine, paliperidone, quetiapine, risperidal, and ziprasidone                                                                                                                                             |
| Benzodiazepine/sedatives/hypnotics | alprazolam, chlordiazepoxide, chlorazepate, clonazepam, diazepam, estazolam, flurazepam, lorazepam, oxazepam, temazepam, triazolam, buspirone, chloral hydrate, eszopiclone, meprobamate, zaleplon, and zolpidem                                                                                                                                                 |
| Stimulants                         | amphetamine, dextroamphetamine, lisdexamphetamine, methamphetamine, dexamethylphenidate, and methylphenidate                                                                                                                                                                                                                                                     |
| Anticonvulsants/mood stabilizers   | carbamazepine, gabapentin, lamotrigine, oxcarbazepine, topiramate, valproate sodium, valproic acid, and divalproex sodium                                                                                                                                                                                                                                        |
| Lithium                            |                                                                                                                                                                                                                                                                                                                                                                  |
